# Supplementary material for: Incorporating Biological Pathways via a Markov Random Field Model in Genome-Wide Association Studies
Source: PubMed Central journal article supplement (PMC3072362; doi:10.1371/journal.pgen.1001353), 2011-04-07
Supplement: pgen.1001353.s003.pdf [file pgen.1001353.s003.pdf]

## Supplementary Text S1

### Proof of Proposition 1

The probability function in (1) can be expressed as

$$Pr(S_1, \dots, S_n | \theta_0) = \frac{1}{z(\theta_0)} \prod_{i \in \mathcal{V}} \exp(U_i),$$

where

$$U_i = hI_1(S_i) + \frac{\tau_0}{2} I_{-1}(S_i) \sum_{j \in N_i} (w_i + w_j) I_{-1}(S_j) + \frac{\tau_1}{2} I_1(S_i) \sum_{j \in N_i} (w_i + w_j) I_1(S_j).$$

The conditional probability of  $S_i$  given all other nodes in  $S_{\mathcal{V}-i}$  is

$$\begin{aligned} Pr(S_i | S_{\mathcal{V}-i}) &= \frac{Pr(S_1, \dots, S_n)}{\sum_{S_i \in \{-1, 1\}} Pr(S_1, \dots, S_i, \dots, S_n)} \\ &= \frac{\exp(U_i) \cdot \prod_{k \in N_i} \exp(U_k) \cdot \prod_{l \in \mathcal{V}-i-N_i} \exp(U_l)}{\prod_{l \in \mathcal{V}-i-N_i} \exp(U_l) \cdot \sum_{S_i \in \{-1, 1\}} \left\{ \exp(U_i) \cdot \prod_{k \in N_i} \exp(U_k) \right\}} \\ &= \frac{\exp(U_i) \cdot \prod_{k \in N_i} \exp(U_k)}{\sum_{S_i \in \{-1, 1\}} \left\{ \exp(U_i) \cdot \prod_{k \in N_i} \exp(U_k) \right\}}. \end{aligned} \quad (9)$$

The last step is true because for any  $l \in \mathcal{V} - i - N_i$ , since  $i$  and  $l$  are not neighbors,  $U_l$  is independent of  $S_i$ . Note that for any  $k \in N_i$ ,  $U_k$  is a function of  $S_i$ :

$$\begin{aligned} U_k &= \exp \left\{ hI_1(S_k) + \frac{\tau_0}{2} I_{-1}(S_k) \sum_{j \in N_k} (w_k + w_j) I_{-1}(S_j) + \frac{\tau_1}{2} I_1(S_k) \sum_{j \in N_k} (w_k + w_j) I_1(S_j) \right\} \\ &= \exp \left\{ hI_1(S_k) + \frac{\tau_0}{2} (w_k + w_i) I_{-1}(S_k) I_{-1}(S_i) + \frac{\tau_0}{2} I_{-1}(S_k) \sum_{j \in N_k - i} (w_k + w_j) I_{-1}(S_j) \right. \\ &\quad \left. + \frac{\tau_1}{2} (w_k + w_i) I_1(S_k) I_1(S_i) + \frac{\tau_1}{2} I_1(S_k) \sum_{j \in N_k - i} (w_k + w_j) I_1(S_j) \right\}. \end{aligned}$$

Thus, (9) becomes

$$\begin{aligned} Pr(S_i | S_{\mathcal{V}-i}) &= \frac{\exp \left\{ hI_1(S_i) + \tau_0 I_{-1}(S_i) \sum_{j \in N_i} (w_i + w_j) I_{-1}(S_j) + \tau_1 I_1(S_i) \sum_{j \in N_i} (w_i + w_j) I_1(S_j) \right\}}{\exp \left\{ h + \tau_1 \sum_{j \in N_i} (w_i + w_j) I_1(S_j) \right\} + \exp \left\{ \tau_0 \sum_{j \in N_i} (w_i + w_j) I_{-1}(S_j) \right\}} \\ &= Pr(S_i | S_{N_i}) \end{aligned}$$

because it only depends on  $S_{N_i}$ . Thus,

$$\begin{aligned} \frac{Pr(S_i = +1 | S_{N_i})}{Pr(S_i = -1 | S_{N_i})} &= \frac{\exp \left\{ h + \tau_1 \sum_{j \in N_i} (w_i + w_j) I_1(S_j) \right\}}{\exp \left\{ \tau_0 \sum_{j \in N_i} (w_i + w_j) I_{-1}(S_j) \right\}} \\ &= \exp \left\{ h + \tau_1 \sum_{j \in N_i} (w_i + w_j) I_1(S_j) - \tau_0 \sum_{j \in N_i} (w_i + w_j) I_{-1}(S_j) \right\}, \end{aligned}$$

which is a logistic regression model that can be rewritten as

$$\text{logit}Pr(S_i|S_{N_i}) = h + \tau_1 \left( w_i J_i^{(1)} + \sum_{j \in N_i} w_j I_1(S_j) \right) - \tau_0 \left( w_i J_i^{(-1)} + \sum_{j \in N_i} w_j I_{-1}(S_j) \right).$$
